# Supplementary material
Source: publisher figshare collection journal article supplement (https://karger.figshare.com/ndownloader/files/13512764)
Supplement: Supplementary file 1 [file 13512764]

**Online Supplementary Material**

**Neonatal Glycemia and Neurodevelopmental Outcomes: A Systematic Review and Meta-analysis**

**Contents**

1. Early Childhood (2-5 years) Outcomes

eFigure 1.1: Neurodevelopmental impairment

eFigure 1.2: Visual-motor impairment

eFigure 1.3: Executive dysfunction

eFigure 1.4: Any cognitive impairment

eFigure 1.5: Mild cognitive impairment

eFigure 1.6: Moderate-severe cognitive impairment

eFigure 1.7: Epilepsy

eFigure 1.8: Emotional behavioral difficulty

eFigure 1.9: Visual impairment

eFigure 1.10: Hearing impairment

eFigure 1.11: Motor impairment

eFigure 1.12: Low language/literacy

2. Mid-Childhood (6-11 years) Outcomes

eFigure 2.1: Neurodevelopmental impairment

eFigure 2.2: Emotional behavioral difficulty

eFigure 2.3: Motor impairment

eFigure 2.4: Low language/literacy

eFigure 2.56: Low numeracy

3. Search Strategy

**1. Early Childhood (2-5 years) Outcomes**

eFigure 1.1: Neurodevelopmental impairment


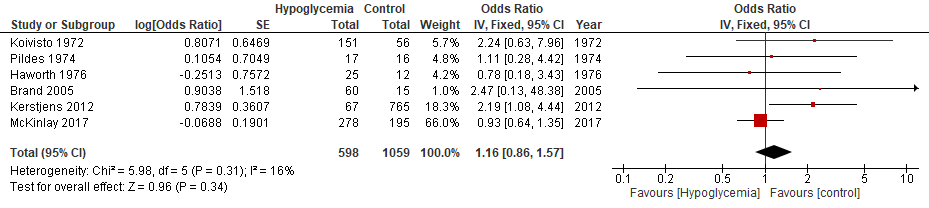


eFigure 1.2: Visual-motor impairment


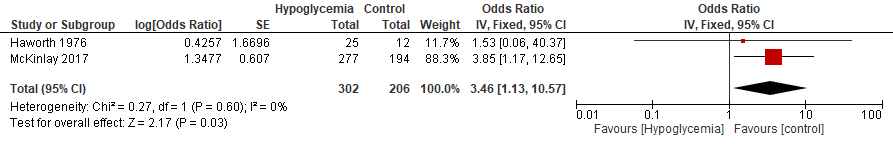


eFigure 1.3: Executive dysfunction


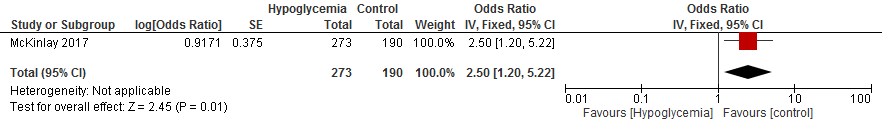


eFigure 1.4: Any cognitive impairment


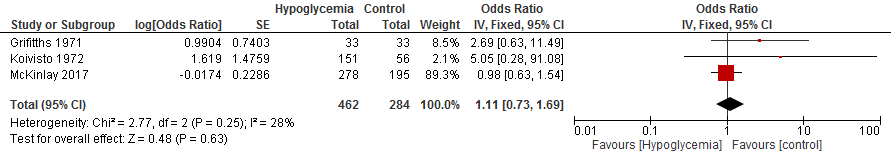


eFigure 1.5: Mild cognitive impairment


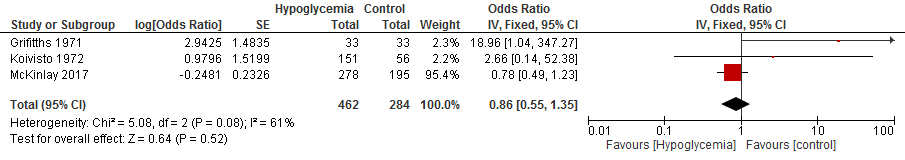


eFigure 1.6: Moderate-severe cognitive impairment


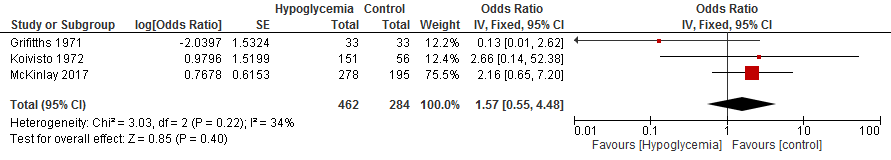


eFigure 1.7: Epilepsy


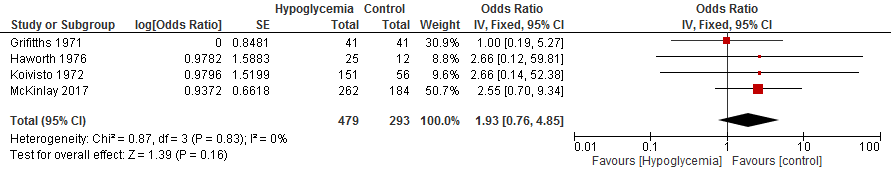


eFigure 1.8: Emotional behavioural difficulty


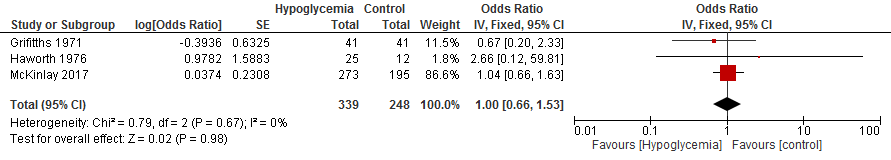


eFigure 1.9: Visual impairment


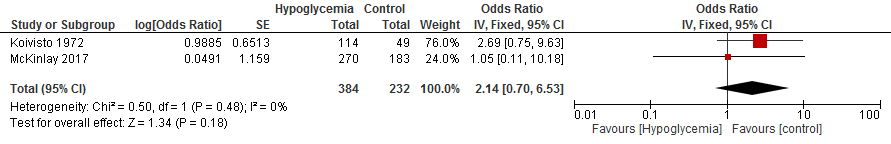


eFigure 1.10: Hearing impairment


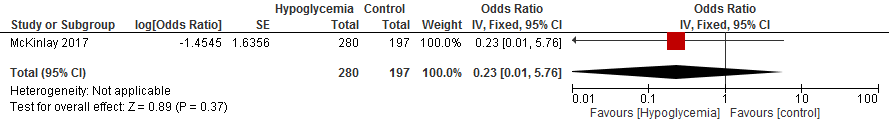


eFigure 11: Motor impairment


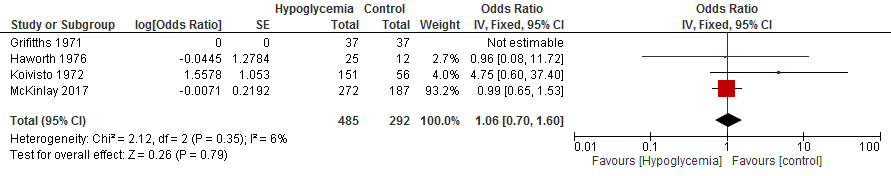


eFigure 1.12: Low language/literacy


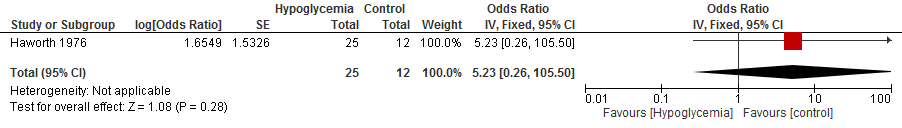


**2. Mid-Childhood (6-11 years) Outcomes**

eFigure 2.1: Neurodevelopmental impairment


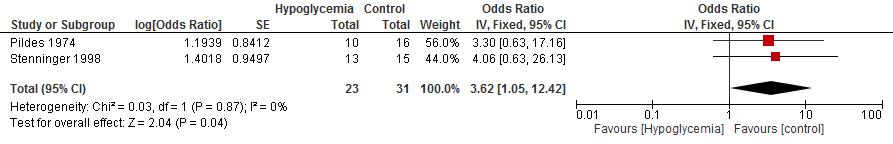


eFigure 2.2: Emotional behavioural difficulty


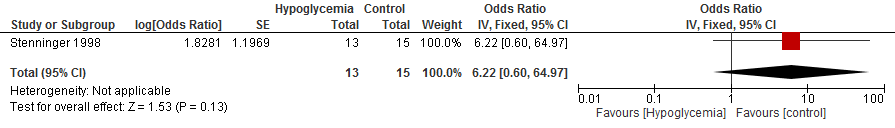


eFigure 2.3: Motor impairment


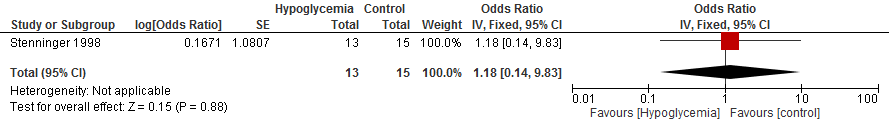


eFigure 2.4: Low language/literacy


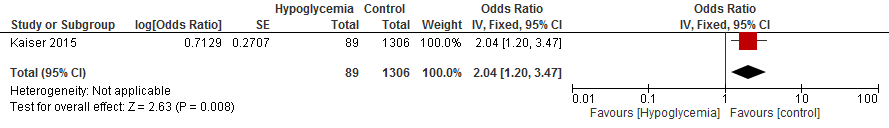


eFigure 2.5: Low numeracy


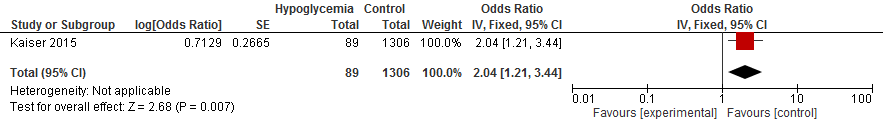


**3. Search Strategy**

1. Infant, Newborn/
2. (neonat* or newborn* or infant*).mp. [mp=title, abstract, original title, name of substance word, subject heading word, keyword heading word, protocol supplementary concept word, rare disease supplementary concept word, unique identifier, synonyms]
3. Hypoglycemia/
4. hypoglyc*.mp. [mp=title, abstract, original title, name of substance word, subject heading word, keyword heading word, protocol supplementary concept word, rare disease supplementary concept word, unique identifier, synonyms]
5. exp Neurodevelopmental Disorders/
6. (neurodevelopment* disorder* or neurodevelopment* outcome* or neurodevelopment* disabilit*).mp. [mp=title, abstract, original title, name of substance word, subject heading word, keyword heading word, protocol supplementary concept word, rare disease supplementary concept word, unique identifier, synonyms]
7. neurodevelopment*.mp. [mp=title, abstract, original title, name of substance word, subject heading word, keyword heading word, protocol supplementary concept word, rare disease supplementary concept word, unique identifier, synonyms]
8. neurological sequelae.mp. [mp=title, abstract, original title, name of substance word, subject heading word, keyword heading word, protocol supplementary concept word, rare disease supplementary concept word, unique identifier, synonyms]
9. exp Neuroimaging/
10. neuroimag*.mp. [mp=title, abstract, original title, name of substance word, subject heading word, keyword heading word, protocol supplementary concept word, rare disease supplementary concept word, unique identifier, synonyms]
11. brain imag*.mp. [mp=title, abstract, original title, name of substance word, subject heading word, keyword heading word, protocol supplementary concept word, rare disease supplementary concept word, unique identifier, synonyms]
12. cranial imag*.mp. [mp=title, abstract, original title, name of substance word, subject heading word, keyword heading word, protocol supplementary concept word, rare disease supplementary concept word, unique identifier, synonyms]
13. (CT scan* or CT imag* or computed tomography scan* or computed tomography imag*).mp. [mp=title, abstract, original title, name of substance word, subject heading word, keyword heading word, protocol supplementary concept word, rare disease supplementary concept word, unique identifier, synonyms]
14. (ultrasonography or sonograph* finding*).mp. [mp=title, abstract, original title, name of substance word, subject heading word, keyword heading word, protocol supplementary concept word, rare disease supplementary concept word, unique identifier, synonyms]
15. (magnetic resonance imaging or MRI).mp. [mp=title, abstract, original title, name of substance word, subject heading word, keyword heading word, protocol supplementary concept word, rare disease supplementary concept word, unique identifier, synonyms]
16. exp Neurologic Manifestations/
17. neurologic* manifestation*.mp. [mp=title, abstract, original title, name of substance word, subject heading word, keyword heading word, protocol supplementary concept word, rare disease supplementary concept word, unique identifier, synonyms]
18. 1 or 2
19. 3 or 4
20. 5 or 6 or 7 or 8 or 9 or 10 or 11 or 12 or 13 or 14 or 15 or 16 or 17
21. 18 and 19 and 20
22. limit 21 to English language
23. limit 22 to humans
